# Supplementary material
Source: Springer Nature journal article supplement (https://www.springermedizin.de/resource/supplementary/12874_2006_171_MOESM1_ESM.pdf/9433918)
Supplement: MOESM1 [file 9433918]

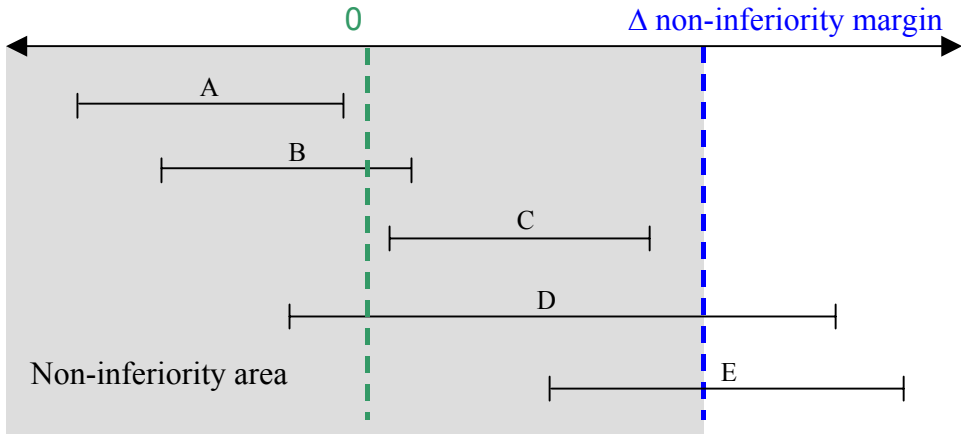

| P-value | D-value |
|---------|---------|
| <0.05   | <0.05   |
| NS*     | <0.05   |
| <0.05   | <0.05   |
| NS      | NS      |
| <0.05   | NS      |

95% confidence interval of the difference in effect

← Favours the new drug      Favours the active-control drug →
